# Supplementary material
Source: ML conference proceedings conference paper supplement (https://openreview.net/forum?id=HYELrdRdJI)
Supplement: supplementary_material [file attachment]

# Dataset Documentation

## Overview

**Motivation.** The dataset is created to resolve the limitations of existing datasets for real-world multi-view object classification and facilitate the development of multi-view-based methods.

**Dataset Name.** MVP-N (Multi-View, Retail Products, Label Noise).

**Design, Construction, and Benchmark.** Details are provided in the main paper.

**Data Content and Type.** Multi-view images are in PNG format with a resolution of  $224 \times 224$ . View-level annotations are represented as the suffixes of image names. ‘0’ and ‘1’ denote ‘uninformative’ and ‘informative’ annotations. Multi-view sets are provided in Pickle files.

**Domain.** <https://github.com/SMNUResearch/MVP-N>. (MIT License)

**License.** Attribution-NonCommercial-NoDerivatives 4.0 International (CC BY-NC-ND 4.0).

**DOI.** <https://doi.org/10.34740/KAGGLE/DS/2267231>.

## Maintenance

**Contact.** Comments can be sent to [wangren@capp.snu.ac.kr](mailto:wangren@capp.snu.ac.kr). Ren Wang maintains the dataset and code. All changes will be posted at <https://github.com/SMNUResearch/MVP-N>.

**Submission Requirements.** Experiments should be conducted following the benchmark in the main paper. The submission should provide the accepted paper and public source code for reproducing results. If there is no error about the submission, we will update it at <https://github.com/SMNUResearch/MVP-N>.

**Error Report.** Dataset download and usage issues, corrupted data files, and annotation errors.

**Dataset Update.** New multi-view sets, real captured views, and objects will be introduced to keep MVP-N challenging.
