# Supplementary material
Source: ML conference proceedings conference paper supplement (https://openreview.net/forum?id=HYELrdRdJI)
Supplement: supplementary_material [file attachment]

| Method                           | RGB-D Object [3] |                   | ModelNet40 [4] |        | ScanObjectNN [5] |       | FG3D [6] (Airplane) |       | FG3D [6] (Chair) |       | FG3D [6] (Car) |       |
|----------------------------------|------------------|-------------------|----------------|--------|------------------|-------|---------------------|-------|------------------|-------|----------------|-------|
|                                  | I                | C                 | AIA            | ACA    | AIA              | ACA   | AIA                 | ACA   | AIA              | ACA   | AIA            | ACA   |
| <i>Two-stage:</i>                |                  |                   |                |        |                  |       |                     |       |                  |       |                |       |
| MVCNN [7]                        | -                | -                 | 90.1*          | 90.1*  | -                | -     | 91.11               | 82.57 | 82.90            | 76.27 | 76.12          | 71.88 |
| Pairwise Network [8]             | -                | -                 | 90.7           | -      | -                | -     | -                   | -     | -                | -     | -              | -     |
| GIFT [9, 10]                     | -                | -                 | 89.50*         | 89.50* | -                | -     | -                   | -     | -                | -     | -              | -     |
| RCPCNN [11]                      | -                | -                 | 92.2           | -      | -                | -     | -                   | -     | -                | -     | -              | -     |
| GVCNN [12]                       | -                | 89.8 <sup>‡</sup> | 93.1*          | 93.1*  | 88.68            | 86.64 | -                   | -     | -                | -     | -              | -     |
| MHBN [13]                        | -                | -                 | 94.12          | 92.23  | -                | -     | -                   | -     | -                | -     | -              | -     |
| VERAM [14]                       | -                | -                 | 93.7           | 92.1   | -                | -     | -                   | -     | -                | -     | -              | -     |
| SeqViews2SeqLabels [15]          | -                | -                 | 93.31          | 91.12  | -                | -     | 93.44               | 88.52 | 82.54            | 79.89 | 75.36          | 72.23 |
| MVCNN-new [16]                   | -                | 89.0 <sup>‡</sup> | 95.9           | 93.4   | 87.82            | 85.71 | -                   | -     | -                | -     | -              | -     |
| MV-LSTM [17]                     | -                | -                 | 91.05          | -      | -                | -     | -                   | -     | -                | -     | -              | -     |
| DeepCCFV [18]                    | -                | -                 | 92.46*         | 92.46* | -                | -     | -                   | -     | -                | -     | -              | -     |
| MLVCNN [19]                      | -                | -                 | 94.16*         | 94.16* | -                | -     | -                   | -     | -                | -     | -              | -     |
| 3D2SeqViews [20]                 | -                | -                 | 93.40          | 91.51  | -                | -     | 92.21               | 89.41 | 77.10            | 76.26 | 66.39          | 63.85 |
| RotationNet [1, 2]               | 97.45            | 99.51             | 97.37          | 96.29  | 86.90            | 84.88 | 92.76               | 89.11 | 82.07            | 78.45 | 75.59          | 72.53 |
| 3DViewGraph [21]                 | -                | -                 | 93.80*         | 93.80* | -                | -     | 93.85               | 88.21 | 83.58            | 79.88 | 77.11          | 71.65 |
| MVSG-DNN [22]                    | -                | -                 | 92.3           | -      | -                | -     | -                   | -     | -                | -     | -              | -     |
| EMVN [23]                        | -                | -                 | 94.67          | -      | -                | -     | -                   | -     | -                | -     | -              | -     |
| Relation Network [24]            | -                | -                 | 94.3           | 92.3   | -                | -     | -                   | -     | -                | -     | -              | -     |
| View-GCN [25]                    | -                | 94.3              | 97.6           | 96.5   | 90.39            | 88.67 | 93.58               | 87.44 | 83.63            | 79.70 | 77.34          | 73.68 |
| HEAR [26]                        | -                | -                 | 96.7           | 95.2   | -                | -     | -                   | -     | -                | -     | -              | -     |
| DRCNN [27]                       | -                | -                 | 96.84          | 94.86  | -                | -     | -                   | -     | -                | -     | -              | -     |
| VMM [28]                         | -                | -                 | 96.72          | 95.24  | -                | -     | -                   | -     | -                | -     | -              | -     |
| JointMVCNN [29]                  | -                | -                 | 94.16*         | 94.16* | -                | -     | -                   | -     | -                | -     | -              | -     |
| MVLADN [30]                      | -                | -                 | 93.96          | 91.68  | -                | -     | -                   | -     | -                | -     | -              | -     |
| DRMV [31]                        | -                | -                 | 96.76          | 95.04  | -                | -     | -                   | -     | -                | -     | -              | -     |
| DAN [32]                         | -                | -                 | 93.5           | -      | -                | -     | -                   | -     | -                | -     | -              | -     |
| CAR-Net [33]                     | -                | -                 | 97.73          | -      | -                | -     | -                   | -     | -                | -     | -              | -     |
| CVR [34]                         | -                | 91.8 <sup>‡</sup> | 97.16          | 95.77  | 90.74            | 88.39 | -                   | -     | -                | -     | -              | -     |
| SVHAN [35]                       | -                | -                 | 94.3           | -      | -                | -     | -                   | -     | -                | -     | -              | -     |
| MVT [36]                         | -                | -                 | 97.5           | -      | -                | -     | -                   | -     | -                | -     | -              | -     |
| VFMVAC [37]                      | -                | 94.90             | 97.97          | 96.80  | -                | -     | -                   | -     | -                | -     | -              | -     |
| <i>Three-stage (Hypergraph):</i> |                  |                   |                |        |                  |       |                     |       |                  |       |                |       |
| iMHL [38]                        | -                | -                 | 97.16*         | 97.16* | -                | -     | -                   | -     | -                | -     | -              | -     |
| HGNN [39]                        | -                | -                 | 96.7           | -      | -                | -     | -                   | -     | -                | -     | -              | -     |
| MHGNN [40]                       | -                | -                 | 97.5           | -      | -                | -     | -                   | -     | -                | -     | -              | -     |
| HGNN <sup>+</sup> [41]           | -                | -                 | 96.92          | -      | -                | -     | -                   | -     | -                | -     | -              | -     |
| AMHCN [42]                       | -                | -                 | 97.86          | -      | -                | -     | -                   | -     | -                | -     | -              | -     |
| GHSC [43]                        | -                | -                 | 97.75          | -      | -                | -     | -                   | -     | -                | -     | -              | -     |
| <i>Three-stage (Part):</i>       |                  |                   |                |        |                  |       |                     |       |                  |       |                |       |
| Parts4Feature [44]               | -                | -                 | 93.40*         | 93.40* | -                | -     | 91.39               | 82.55 | 81.61            | 77.08 | 75.44          | 73.42 |
| FG3D-Net [6]                     | -                | -                 | -              | -      | -                | -     | 93.99               | 89.44 | 83.94            | 80.04 | 79.47          | 74.03 |

Table 1: **I**: Instance-level accuracy. **C**: Category-level accuracy. **AIA**: Average instance accuracy. **ACA**: Average class accuracy. ‘—’: Results are not reported. ‘\*’: The train/test split is 80 training samples (or all samples if the number is less than 80) and 20 test samples for each category. ‘<sup>‡</sup>’: Results are quoted from [34]. Results on ScanObjectNN [5] and FG3D [6] are respectively quoted from [34] and [6]. All results are reported in percentage.

## A Performance

Table 1 lists the performance of 39 multi-view-based feature aggregation methods on four existing datasets. Since MIRO [1] is only used in [1, 2], results are not included here.

| Method | Configuration                          | MVA (%) $\uparrow$                 | MCC $\uparrow$                        | MCW $\downarrow$                      | Model Size (M) $\downarrow$ | FLOPs (G) $\downarrow$ | Latency (ms) $\downarrow$          |
|--------|----------------------------------------|------------------------------------|---------------------------------------|---------------------------------------|-----------------------------|------------------------|------------------------------------|
| DAN    | $h = 1$                                | 91.87 $\pm$ 0.90                   | 0.8569 $\pm$ 0.0036                   | <b>0.6148 <math>\pm</math> 0.0068</b> | <b>14.35</b>                | <b>10.93</b>           | <b>7.18 <math>\pm</math> 0.07</b>  |
| DAN    | <b><math>h = 2</math></b>              | <b>92.05 <math>\pm</math> 0.56</b> | 0.8592 $\pm$ 0.0044                   | 0.6192 $\pm$ 0.0055                   | 17.50                       | 10.95                  | 8.11 $\pm$ 0.04                    |
| DAN    | $h = 3$                                | 90.75 $\pm$ 1.18                   | 0.8679 $\pm$ 0.0108                   | 0.6340 $\pm$ 0.0124                   | 20.66                       | 10.97                  | 8.98 $\pm$ 0.04                    |
| DAN    | $h = 4$                                | 90.65 $\pm$ 0.76                   | 0.8852 $\pm$ 0.0073                   | 0.6537 $\pm$ 0.0135                   | 23.81                       | 10.99                  | 9.92 $\pm$ 0.03                    |
| DAN    | $h = 5$                                | 90.20 $\pm$ 1.33                   | 0.8859 $\pm$ 0.0130                   | 0.6619 $\pm$ 0.0137                   | 26.96                       | 11.01                  | 10.83 $\pm$ 0.05                   |
| DAN    | $h = 6$                                | 89.54 $\pm$ 1.30                   | 0.8977 $\pm$ 0.0087                   | 0.6758 $\pm$ 0.0072                   | 30.11                       | 11.02                  | 11.71 $\pm$ 0.05                   |
| DAN    | $h = 7$                                | 89.20 $\pm$ 0.86                   | <b>0.9015 <math>\pm</math> 0.0043</b> | 0.6913 $\pm$ 0.0111                   | 33.27                       | 11.04                  | 12.62 $\pm$ 0.08                   |
| DAN    | $h = 8$                                | 88.87 $\pm$ 1.31                   | 0.8990 $\pm$ 0.0074                   | 0.6890 $\pm$ 0.0151                   | 36.42                       | 11.06                  | 13.52 $\pm$ 0.06                   |
| CVR    | $M = 4, \lambda = 0.1$                 | 70.50 $\pm$ 6.61                   | 0.8078 $\pm$ 0.0306                   | 0.6432 $\pm$ 0.0518                   | <b>34.38</b>                | <b>11.02</b>           | <b>12.46 <math>\pm</math> 0.09</b> |
| CVR    | $M = 8, \lambda = 0.1$                 | 64.18 $\pm$ 1.50                   | 0.8175 $\pm$ 0.0058                   | 0.6633 $\pm$ 0.0161                   | 34.38                       | 11.08                  | 12.57 $\pm$ 0.07                   |
| CVR    | $M = 16, \lambda = 0.1$                | 55.53 $\pm$ 3.07                   | 0.8116 $\pm$ 0.0148                   | 0.6589 $\pm$ 0.0260                   | 34.39                       | 11.18                  | 12.79 $\pm$ 0.06                   |
| CVR    | $M = 4, \lambda = 0.5$                 | 77.44 $\pm$ 2.31                   | 0.8075 $\pm$ 0.0181                   | 0.6379 $\pm$ 0.0231                   | <b>34.38</b>                | <b>11.02</b>           | <b>12.46 <math>\pm</math> 0.09</b> |
| CVR    | $M = 8, \lambda = 0.5$                 | 78.27 $\pm$ 2.04                   | 0.8291 $\pm$ 0.0062                   | 0.6484 $\pm$ 0.0116                   | 34.38                       | 11.08                  | 12.57 $\pm$ 0.07                   |
| CVR    | $M = 16, \lambda = 0.5$                | 76.93 $\pm$ 1.94                   | 0.8271 $\pm$ 0.0106                   | 0.6631 $\pm$ 0.0107                   | 34.39                       | 11.18                  | 12.79 $\pm$ 0.06                   |
| CVR    | $M = 4, \lambda = 1$                   | 78.58 $\pm$ 1.41                   | 0.8172 $\pm$ 0.0121                   | <b>0.6335 <math>\pm</math> 0.0198</b> | <b>34.38</b>                | <b>11.02</b>           | <b>12.46 <math>\pm</math> 0.09</b> |
| CVR    | <b><math>M = 8, \lambda = 1</math></b> | <b>79.95 <math>\pm</math> 1.89</b> | 0.8347 $\pm$ 0.0118                   | 0.6564 $\pm$ 0.0157                   | 34.38                       | 11.08                  | 12.57 $\pm$ 0.07                   |
| CVR    | $M = 16, \lambda = 1$                  | 76.22 $\pm$ 2.38                   | <b>0.8358 <math>\pm</math> 0.0130</b> | 0.6808 $\pm$ 0.0174                   | 34.39                       | 11.18                  | 12.79 $\pm$ 0.06                   |

Table 2: Performance of multi-view-based feature aggregation methods with different configurations.

## B Hyperparameter Search

### B.1 Range of hyperparameters

DAN [32]: Number of sublayers  $h \in [1, 2, 3, 4, 5, 6, 7, 8]$ .

CVR [34]: Number of canonical views  $M \in [4, 8, 16]$ . Weighting factor  $\lambda \in [0.1, 0.5, 1]$ .

KD [45]: Temperature  $T \in [2, 2.5, 3, 3.5, 4]$ .

SB [46]: Weighting factor  $\beta \in [0.5, 0.55, 0.6, 0.65, 0.7, 0.75, 0.8, 0.85, 0.9, 0.95]$ .

HB [46]: Weighting factor  $\beta \in [0.5, 0.55, 0.6, 0.65, 0.7, 0.75, 0.8, 0.85, 0.9, 0.95]$ .

SEAL [47]: Number of iterations  $I \in [1, 2, 3, 4, 5]$ .

PLC [48]: Initial confidence threshold  $\theta_0 \in [0.2, 0.3, 0.4, 0.5]$ . Step size  $\beta \in [0.05, 0.1, 0.2, 0.3]$ .

OLS [49]: Weighting factor  $\alpha \in [0.1, 0.2, 0.3, 0.4, 0.5, 0.6, 0.7, 0.8, 0.9]$ .

### B.2 Results

Tables 2 and 3 show the results of hyperparameter search for two multi-view-based feature aggregation methods and six soft label methods, respectively. The best configuration for each method is marked with blue.

| Method | Configuration                  | SVA (%)          | SVAI (%) $\uparrow$                | MCCI $\uparrow$                       | MCWI $\downarrow$                     | MCDU $\downarrow$                     | MVA (%) $\uparrow$                 |
|--------|--------------------------------|------------------|------------------------------------|---------------------------------------|---------------------------------------|---------------------------------------|------------------------------------|
| KD     | $T = 2$                        | 78.47 $\pm$ 0.55 | <b>99.62 <math>\pm</math> 0.08</b> | <b>0.9587 <math>\pm</math> 0.0009</b> | 0.5799 $\pm$ 0.0295                   | 0.3867 $\pm$ 0.0040                   | <b>85.72 <math>\pm</math> 1.24</b> |
| KD     | $T = 2.5$                      | 78.20 $\pm$ 0.69 | 99.58 $\pm$ 0.09                   | 0.9584 $\pm$ 0.0012                   | 0.5908 $\pm$ 0.0422                   | 0.3837 $\pm$ 0.0046                   | 85.58 $\pm$ 1.63                   |
| KD     | $T = 3$                        | 77.64 $\pm$ 0.76 | 99.59 $\pm$ 0.10                   | 0.9569 $\pm$ 0.0015                   | 0.5760 $\pm$ 0.0382                   | 0.3827 $\pm$ 0.0050                   | 84.99 $\pm$ 1.34                   |
| KD     | $T = 3.5$                      | 77.23 $\pm$ 0.59 | 99.52 $\pm$ 0.10                   | 0.9546 $\pm$ 0.0012                   | <b>0.5751 <math>\pm</math> 0.0398</b> | 0.3817 $\pm$ 0.0061                   | 84.41 $\pm$ 1.41                   |
| KD     | $T = 4$                        | 76.70 $\pm$ 0.75 | 99.49 $\pm$ 0.12                   | 0.9525 $\pm$ 0.0014                   | 0.5862 $\pm$ 0.0299                   | <b>0.3755 <math>\pm</math> 0.0048</b> | 83.50 $\pm$ 1.27                   |
| SB     | $\beta = 0.5$                  | 74.41 $\pm$ 0.36 | 99.08 $\pm$ 0.33                   | 0.8911 $\pm$ 0.0074                   | <b>0.5573 <math>\pm</math> 0.0177</b> | <b>0.2945 <math>\pm</math> 0.0046</b> | <b>83.31 <math>\pm</math> 0.41</b> |
| SB     | $\beta = 0.55$                 | 74.78 $\pm$ 0.31 | 99.13 $\pm$ 0.30                   | 0.9040 $\pm$ 0.0045                   | 0.5635 $\pm$ 0.0197                   | 0.3193 $\pm$ 0.0100                   | 82.88 $\pm$ 0.72                   |
| SB     | $\beta = 0.6$                  | 75.09 $\pm$ 0.36 | 99.16 $\pm$ 0.24                   | 0.9112 $\pm$ 0.0062                   | 0.5681 $\pm$ 0.0238                   | 0.3320 $\pm$ 0.0116                   | 82.59 $\pm$ 0.83                   |
| SB     | $\beta = 0.65$                 | 75.35 $\pm$ 0.35 | 99.24 $\pm$ 0.23                   | 0.9175 $\pm$ 0.0056                   | 0.5771 $\pm$ 0.0253                   | 0.3440 $\pm$ 0.0105                   | 82.66 $\pm$ 0.66                   |
| SB     | $\beta = 0.7$                  | 75.63 $\pm$ 0.27 | 99.25 $\pm$ 0.21                   | 0.9209 $\pm$ 0.0053                   | 0.5877 $\pm$ 0.0255                   | 0.3492 $\pm$ 0.0138                   | 82.88 $\pm$ 1.13                   |
| SB     | $\beta = 0.75$                 | 75.79 $\pm$ 0.32 | 99.28 $\pm$ 0.22                   | 0.9296 $\pm$ 0.0033                   | 0.5897 $\pm$ 0.0316                   | 0.3686 $\pm$ 0.0097                   | 82.31 $\pm$ 0.70                   |
| SB     | $\beta = 0.8$                  | 76.05 $\pm$ 0.30 | 99.34 $\pm$ 0.18                   | 0.9340 $\pm$ 0.0027                   | 0.5976 $\pm$ 0.0375                   | 0.3772 $\pm$ 0.0099                   | 82.48 $\pm$ 0.66                   |
| SB     | $\beta = 0.85$                 | 76.20 $\pm$ 0.25 | 99.33 $\pm$ 0.16                   | 0.9384 $\pm$ 0.0027                   | 0.5898 $\pm$ 0.0397                   | 0.3850 $\pm$ 0.0128                   | 82.46 $\pm$ 0.71                   |
| SB     | $\beta = 0.9$                  | 76.43 $\pm$ 0.21 | 99.40 $\pm$ 0.22                   | 0.9412 $\pm$ 0.0037                   | 0.6086 $\pm$ 0.0390                   | 0.3879 $\pm$ 0.0102                   | 82.66 $\pm$ 0.58                   |
| SB     | $\beta = 0.95$                 | 76.58 $\pm$ 0.17 | <b>99.44 <math>\pm</math> 0.17</b> | <b>0.9441 <math>\pm</math> 0.0033</b> | 0.6075 $\pm$ 0.0383                   | 0.3913 $\pm$ 0.0095                   | 82.77 $\pm$ 0.76                   |
| HB     | $\beta = 0.5$                  | 75.87 $\pm$ 0.48 | 99.32 $\pm$ 0.18                   | 0.9407 $\pm$ 0.0029                   | <b>0.6039 <math>\pm</math> 0.0287</b> | <b>0.3863 <math>\pm</math> 0.0156</b> | 82.44 $\pm$ 1.14                   |
| HB     | $\beta = 0.55$                 | 76.10 $\pm$ 0.42 | 99.40 $\pm$ 0.23                   | 0.9421 $\pm$ 0.0046                   | 0.6063 $\pm$ 0.0161                   | 0.3942 $\pm$ 0.0096                   | 82.46 $\pm$ 0.79                   |
| HB     | $\beta = 0.6$                  | 76.19 $\pm$ 0.33 | 99.40 $\pm$ 0.15                   | 0.9429 $\pm$ 0.0039                   | 0.6052 $\pm$ 0.0240                   | 0.3964 $\pm$ 0.0120                   | 82.15 $\pm$ 0.98                   |
| HB     | $\beta = 0.65$                 | 76.18 $\pm$ 0.24 | 99.43 $\pm$ 0.19                   | 0.9447 $\pm$ 0.0033                   | 0.6196 $\pm$ 0.0365                   | 0.4008 $\pm$ 0.0094                   | 82.26 $\pm$ 0.98                   |
| HB     | $\beta = 0.7$                  | 76.33 $\pm$ 0.23 | 99.42 $\pm$ 0.17                   | 0.9449 $\pm$ 0.0031                   | 0.6288 $\pm$ 0.0363                   | 0.4022 $\pm$ 0.0054                   | 82.13 $\pm$ 0.72                   |
| HB     | $\beta = 0.75$                 | 76.35 $\pm$ 0.35 | 99.41 $\pm$ 0.12                   | 0.9460 $\pm$ 0.0039                   | 0.6208 $\pm$ 0.0422                   | 0.4039 $\pm$ 0.0089                   | 82.28 $\pm$ 0.46                   |
| HB     | $\beta = 0.8$                  | 76.49 $\pm$ 0.35 | 99.41 $\pm$ 0.16                   | 0.9459 $\pm$ 0.0032                   | 0.6147 $\pm$ 0.0424                   | 0.4025 $\pm$ 0.0084                   | 82.43 $\pm$ 0.58                   |
| HB     | $\beta = 0.85$                 | 76.61 $\pm$ 0.35 | 99.45 $\pm$ 0.22                   | 0.9462 $\pm$ 0.0030                   | 0.6258 $\pm$ 0.0418                   | 0.4027 $\pm$ 0.0093                   | 82.46 $\pm$ 0.70                   |
| HB     | $\beta = 0.9$                  | 76.58 $\pm$ 0.21 | <b>99.47 <math>\pm</math> 0.20</b> | 0.9457 $\pm$ 0.0025                   | 0.6039 $\pm$ 0.0428                   | 0.4003 $\pm$ 0.0151                   | 82.53 $\pm$ 0.90                   |
| HB     | $\beta = 0.95$                 | 76.69 $\pm$ 0.18 | 99.44 $\pm$ 0.16                   | <b>0.9469 <math>\pm</math> 0.0029</b> | 0.6073 $\pm$ 0.0369                   | 0.3989 $\pm$ 0.0097                   | <b>82.73 <math>\pm</math> 0.60</b> |
| SEAL   | $I = 1$                        | 74.28 $\pm$ 0.42 | 98.83 $\pm$ 0.28                   | <b>0.7838 <math>\pm</math> 0.0039</b> | 0.4964 $\pm$ 0.0322                   | 0.2015 $\pm$ 0.0030                   | 85.35 $\pm$ 1.07                   |
| SEAL   | $I = 2$                        | 71.97 $\pm$ 0.33 | <b>98.92 <math>\pm</math> 0.23</b> | 0.6846 $\pm$ 0.0036                   | 0.4379 $\pm$ 0.0102                   | 0.1404 $\pm$ 0.0018                   | <b>85.48 <math>\pm</math> 0.65</b> |
| SEAL   | $I = 3$                        | 69.16 $\pm$ 0.61 | 98.28 $\pm$ 0.38                   | 0.5987 $\pm$ 0.0050                   | 0.4109 $\pm$ 0.0141                   | 0.1055 $\pm$ 0.0027                   | 83.82 $\pm$ 0.73                   |
| SEAL   | $I = 4$                        | 66.09 $\pm$ 0.23 | 97.08 $\pm$ 0.27                   | 0.5291 $\pm$ 0.0032                   | 0.3794 $\pm$ 0.0107                   | 0.0866 $\pm$ 0.0018                   | 81.33 $\pm$ 0.73                   |
| SEAL   | $I = 5$                        | 63.62 $\pm$ 0.64 | 94.99 $\pm$ 1.02                   | 0.4667 $\pm$ 0.0018                   | <b>0.3379 <math>\pm</math> 0.0107</b> | <b>0.0761 <math>\pm</math> 0.0025</b> | 76.91 $\pm$ 0.75                   |
| PLC    | $\theta_0 = 0.2, \beta = 0.05$ | 76.51 $\pm$ 0.27 | <b>99.33 <math>\pm</math> 0.20</b> | 0.9469 $\pm$ 0.0033                   | 0.6126 $\pm$ 0.0424                   | <b>0.4042 <math>\pm</math> 0.0119</b> | <b>82.37 <math>\pm</math> 0.72</b> |
| PLC    | $\theta_0 = 0.2, \beta = 0.1$  | 76.15 $\pm$ 0.30 | 99.27 $\pm$ 0.17                   | <b>0.9484 <math>\pm</math> 0.0016</b> | <b>0.6073 <math>\pm</math> 0.0424</b> | 0.4200 $\pm$ 0.0051                   | 81.55 $\pm$ 0.55                   |
| PLC    | $\theta_0 = 0.2, \beta = 0.2$  | 75.48 $\pm$ 0.29 | 99.22 $\pm$ 0.20                   | 0.9466 $\pm$ 0.0024                   | 0.6417 $\pm$ 0.0374                   | 0.4379 $\pm$ 0.0140                   | 80.46 $\pm$ 0.91                   |
| PLC    | $\theta_0 = 0.2, \beta = 0.3$  | 74.17 $\pm$ 0.40 | 98.93 $\pm$ 0.31                   | 0.9454 $\pm$ 0.0039                   | 0.6093 $\pm$ 0.0287                   | 0.4646 $\pm$ 0.0128                   | 78.47 $\pm$ 0.79                   |
| PLC    | $\theta_0 = 0.3, \beta = 0.05$ | 75.50 $\pm$ 0.79 | 98.91 $\pm$ 0.24                   | 0.9448 $\pm$ 0.0030                   | 0.6479 $\pm$ 0.0258                   | 0.4209 $\pm$ 0.0089                   | 80.85 $\pm$ 1.05                   |
| PLC    | $\theta_0 = 0.3, \beta = 0.1$  | 75.37 $\pm$ 0.81 | 98.93 $\pm$ 0.19                   | 0.9459 $\pm$ 0.0040                   | 0.6469 $\pm$ 0.0476                   | 0.4345 $\pm$ 0.0149                   | 80.30 $\pm$ 1.50                   |
| PLC    | $\theta_0 = 0.3, \beta = 0.2$  | 74.84 $\pm$ 1.05 | 98.93 $\pm$ 0.27                   | 0.9458 $\pm$ 0.0038                   | 0.6528 $\pm$ 0.0439                   | 0.4473 $\pm$ 0.0228                   | 79.61 $\pm$ 1.87                   |
| PLC    | $\theta_0 = 0.3, \beta = 0.3$  | 73.79 $\pm$ 1.39 | 98.84 $\pm$ 0.35                   | 0.9450 $\pm$ 0.0035                   | 0.6774 $\pm$ 0.0488                   | 0.4715 $\pm$ 0.0301                   | 77.60 $\pm$ 2.43                   |
| PLC    | $\theta_0 = 0.4, \beta = 0.05$ | 73.83 $\pm$ 0.88 | 98.27 $\pm$ 0.36                   | 0.9412 $\pm$ 0.0040                   | 0.6830 $\pm$ 0.0150                   | 0.4475 $\pm$ 0.0069                   | 79.17 $\pm$ 1.51                   |
| PLC    | $\theta_0 = 0.4, \beta = 0.1$  | 73.67 $\pm$ 0.99 | 98.26 $\pm$ 0.49                   | 0.9415 $\pm$ 0.0027                   | 0.6859 $\pm$ 0.0254                   | 0.4521 $\pm$ 0.0073                   | 79.03 $\pm$ 1.32                   |
| PLC    | $\theta_0 = 0.4, \beta = 0.2$  | 72.96 $\pm$ 0.74 | 98.25 $\pm$ 0.50                   | 0.9441 $\pm$ 0.0047                   | 0.6861 $\pm$ 0.0484                   | 0.4886 $\pm$ 0.0150                   | 77.20 $\pm$ 1.00                   |
| PLC    | $\theta_0 = 0.4, \beta = 0.3$  | 71.99 $\pm$ 0.40 | 98.17 $\pm$ 0.38                   | 0.9443 $\pm$ 0.0058                   | 0.6824 $\pm$ 0.0321                   | 0.5163 $\pm$ 0.0106                   | 75.80 $\pm$ 0.83                   |
| PLC    | $\theta_0 = 0.5, \beta = 0.05$ | 70.51 $\pm$ 1.74 | 96.70 $\pm$ 0.77                   | 0.9383 $\pm$ 0.0044                   | 0.7021 $\pm$ 0.0203                   | 0.5238 $\pm$ 0.0063                   | 73.65 $\pm$ 2.62                   |
| PLC    | $\theta_0 = 0.5, \beta = 0.1$  | 70.52 $\pm$ 1.75 | 96.67 $\pm$ 0.76                   | 0.9385 $\pm$ 0.0043                   | 0.7023 $\pm$ 0.0245                   | 0.5267 $\pm$ 0.0073                   | 73.67 $\pm$ 2.61                   |
| PLC    | $\theta_0 = 0.5, \beta = 0.2$  | 70.47 $\pm$ 1.74 | 96.63 $\pm$ 0.86                   | 0.9361 $\pm$ 0.0071                   | 0.6996 $\pm$ 0.0267                   | 0.5212 $\pm$ 0.0165                   | 73.79 $\pm$ 2.52                   |
| PLC    | $\theta_0 = 0.5, \beta = 0.3$  | 70.40 $\pm$ 1.76 | 96.66 $\pm$ 0.84                   | 0.9357 $\pm$ 0.0071                   | 0.7032 $\pm$ 0.0302                   | 0.5267 $\pm$ 0.0168                   | 73.48 $\pm$ 2.50                   |
| OLS    | $\alpha = 0.1$                 | 67.94 $\pm$ 0.39 | 92.22 $\pm$ 0.77                   | 0.3917 $\pm$ 0.0036                   | <b>0.3214 <math>\pm</math> 0.0070</b> | <b>0.0610 <math>\pm</math> 0.0011</b> | 75.27 $\pm$ 1.14                   |
| OLS    | $\alpha = 0.2$                 | 72.03 $\pm$ 0.68 | 96.23 $\pm$ 0.52                   | 0.5635 $\pm$ 0.0026                   | 0.4285 $\pm$ 0.0099                   | 0.1086 $\pm$ 0.0017                   | 80.04 $\pm$ 0.93                   |
| OLS    | $\alpha = 0.3$                 | 73.89 $\pm$ 0.38 | 97.57 $\pm$ 0.41                   | 0.6823 $\pm$ 0.0052                   | 0.4826 $\pm$ 0.0143                   | 0.1638 $\pm$ 0.0051                   | 81.15 $\pm$ 0.92                   |
| OLS    | $\alpha = 0.4$                 | 74.82 $\pm$ 0.43 | 98.18 $\pm$ 0.31                   | 0.7667 $\pm$ 0.0069                   | 0.5151 $\pm$ 0.0133                   | 0.2149 $\pm$ 0.0100                   | 82.45 $\pm$ 0.98                   |
| OLS    | $\alpha = 0.5$                 | 75.42 $\pm$ 0.35 | 98.64 $\pm$ 0.32                   | 0.8274 $\pm$ 0.0037                   | 0.5397 $\pm$ 0.0167                   | 0.2643 $\pm$ 0.0085                   | 82.30 $\pm$ 1.05                   |
| OLS    | $\alpha = 0.6$                 | 75.81 $\pm$ 0.28 | 98.93 $\pm$ 0.23                   | 0.8623 $\pm$ 0.0090                   | 0.5605 $\pm$ 0.0155                   | 0.2955 $\pm$ 0.0144                   | 82.47 $\pm$ 0.60                   |
| OLS    | $\alpha = 0.7$                 | 76.17 $\pm$ 0.24 | 99.05 $\pm$ 0.25                   | 0.8938 $\pm$ 0.0078                   | 0.5730 $\pm$ 0.0117                   | 0.3304 $\pm$ 0.0096                   | 82.46 $\pm$ 0.68                   |
| OLS    | $\alpha = 0.8$                 | 76.35 $\pm$ 0.19 | 99.16 $\pm$ 0.15                   | 0.9181 $\pm$ 0.0036                   | 0.5780 $\pm$ 0.0258                   | 0.3604 $\pm$ 0.0099                   | 82.60 $\pm$ 0.58                   |
| OLS    | $\alpha = 0.9$                 | 76.63 $\pm$ 0.14 | <b>99.30 <math>\pm</math> 0.17</b> | <b>0.9336 <math>\pm</math> 0.0041</b> | 0.5852 $\pm$ 0.0273                   | 0.3774 $\pm$ 0.0101                   | <b>82.90 <math>\pm</math> 0.57</b> |

Table 3: Performance of soft label methods with different configurations.

## References

- [1] Asako Kanezaki, Yasuyuki Matsushita, and Yoshifumi Nishida. Rotationnet: Joint object categorization and pose estimation using multiviews from unsupervised viewpoints. In *Proc. IEEE Conf. Comput. Vis. Pattern Recognit. (CVPR)*, pages 5010–5019, 2018.
- [2] Asako Kanezaki, Yasuyuki Matsushita, and Yoshifumi Nishida. Rotationnet for joint object categorization and unsupervised pose estimation from multi-view images. *IEEE Trans. Pattern Anal. Mach. Intell. (TPAMI)*, 43(1):269–283, 2019.
- [3] Kevin Lai, Liefeng Bo, Xiaofeng Ren, and Dieter Fox. A large-scale hierarchical multi-view rgb-d object dataset. In *IEEE Conf. Robot. Automat. (ICRA)*, pages 1817–1824, 2011.
- [4] Zhirong Wu, Shuran Song, Aditya Khosla, Fisher Yu, Linguang Zhang, Xiaoou Tang, and Jianxiong Xiao. 3d shapenets: A deep representation for volumetric shapes. In *Proc. IEEE Conf. Comput. Vis. Pattern Recognit. (CVPR)*, pages 1912–1920, 2015.
- [5] Mikaela Angelina Uy, Quang-Hieu Pham, Binh-Son Hua, Thanh Nguyen, and Sai-Kit Yeung. Revisiting point cloud classification: A new benchmark dataset and classification model on real-world data. In *Proc. IEEE Int. Conf. Comput. Vis. (ICCV)*, pages 1588–1597, 2019.
- [6] Xinhai Liu, Zhizhong Han, Yu-Shen Liu, and Matthias Zwicker. Fine-grained 3d shape classification with hierarchical part-view attention. *IEEE Trans. Image Process. (TIP)*, 30:1744–1758, 2021.
- [7] Hang Su, Subhransu Maji, Evangelos Kalogerakis, and Erik Learned-Miller. Multi-view convolutional neural networks for 3d shape recognition. In *Proc. IEEE Int. Conf. Comput. Vis. (ICCV)*, pages 945–953, 2015.
- [8] Edward Johns, Stefan Leutenegger, and Andrew J Davison. Pairwise decomposition of image sequences for active multi-view recognition. In *Proc. IEEE Conf. Comput. Vis. Pattern Recognit. (CVPR)*, pages 3813–3822, 2016.
- [9] Song Bai, Xiang Bai, Zhichao Zhou, Zhaoxiang Zhang, and Longin Jan Latecki. Gift: A real-time and scalable 3d shape search engine. In *Proc. IEEE Conf. Comput. Vis. Pattern Recognit. (CVPR)*, pages 5023–5032, 2016.
- [10] Song Bai, Xiang Bai, Zhichao Zhou, Zhaoxiang Zhang, Qi Tian, and Longin Jan Latecki. Gift: Towards scalable 3d shape retrieval. *IEEE Trans. Multimedia (TMM)*, 19(6):1257–1271, 2017.
- [11] Chu Wang, Marcello Pelillo, and Kaleem Siddiqi. Dominant set clustering and pooling for multi-view 3d object recognition. In *Proc. Brit. Mach. Vis. Conf. (BMVC)*, 2017.
- [12] Yifan Feng, Zizhao Zhang, Xibin Zhao, Rongrong Ji, and Yue Gao. Gvcnn: Group-view convolutional neural networks for 3d shape recognition. In *Proc. IEEE Conf. Comput. Vis. Pattern Recognit. (CVPR)*, pages 264–272, 2018.
- [13] Tan Yu, Jingjing Meng, and Junsong Yuan. Multi-view harmonized bilinear network for 3d object recognition. In *Proc. IEEE Conf. Comput. Vis. Pattern Recognit. (CVPR)*, pages 186–194, 2018.
- [14] Songle Chen, Lintao Zheng, Yan Zhang, Zhixin Sun, and Kai Xu. Veram: View-enhanced recurrent attention model for 3d shape classification. *IEEE Trans. Vis. Comput. Graphics (TVCG)*, 25(12):3244–3257, 2018.
- [15] Zhizhong Han, Mingyang Shang, Zhenbao Liu, Chi-Man Vong, Yu-Shen Liu, Matthias Zwicker, Junwei Han, and CL Philip Chen. Seqviews2seqlabels: Learning 3d global features via aggregating sequential views by rnn with attention. *IEEE Trans. Image Process. (TIP)*, 28(2):658–672, 2018.
- [16] Jong-Chyi Su, Matheus Gadelha, Rui Wang, and Subhransu Maji. A deeper look at 3d shape classifiers. In *Proc. Eur. Conf. Comput. Vis. Workshops (ECCVW)*, 2018.
- [17] Chao Ma, Yulan Guo, Jungang Yang, and Wei An. Learning multi-view representation with lstm for 3-d shape recognition and retrieval. *IEEE Trans. Multimedia (TMM)*, 21(5):1169–1182, 2018.
- [18] Zhengyue Huang, Zhehui Zhao, Hengguang Zhou, Xibin Zhao, and Yue Gao. Deepccfv: Camera constraint-free multi-view convolutional neural network for 3d object retrieval. In *Proc. AAAI Conf. Artif. Intell. (AAAI)*, volume 33, pages 8505–8512, 2019.
- [19] Jianwen Jiang, Di Bao, Ziqiang Chen, Xibin Zhao, and Yue Gao. Mlvcnn: Multi-loop-view convolutional neural network for 3d shape retrieval. In *Proc. AAAI Conf. Artif. Intell. (AAAI)*, volume 33, pages 8513–8520, 2019.

- [20] Zhizhong Han, Honglei Lu, Zhenbao Liu, Chi-Man Vong, Yu-Shen Liu, Matthias Zwicker, Junwei Han, and CL Philip Chen. 3d2seqviews: Aggregating sequential views for 3d global feature learning by cnn with hierarchical attention aggregation. *IEEE Trans. Image Process. (TIP)*, 28(8):3986–3999, 2019.
- [21] Zhizhong Han, Xiyang Wang, Chi Man Vong, Yu-Shen Liu, Matthias Zwicker, and CL Chen. 3dviewgraph: Learning global features for 3d shapes from a graph of unordered views with attention. In *Proc. Int. Joint Conf. Artif. Intell. (IJCAI)*, 2019.
- [22] He-Yu Zhou, An-An Liu, Wei-Zhi Nie, and Jie Nie. Multi-view saliency guided deep neural network for 3-d object retrieval and classification. *IEEE Trans. Multimedia (TMM)*, 22(6):1496–1506, 2019.
- [23] Carlos Esteves, Yinshuang Xu, Christine Allen-Blanchette, and Kostas Daniilidis. Equivariant multi-view networks. In *Proc. IEEE Int. Conf. Comput. Vis. (ICCV)*, pages 1568–1577, 2019.
- [24] Ze Yang and Liwei Wang. Learning relationships for multi-view 3d object recognition. In *Proc. IEEE Int. Conf. Comput. Vis. (ICCV)*, pages 7505–7514, 2019.
- [25] Xin Wei, Ruixuan Yu, and Jian Sun. View-gcn: View-based graph convolutional network for 3d shape analysis. In *Proc. IEEE Conf. Comput. Vis. Pattern Recognit. (CVPR)*, pages 1850–1859, 2020.
- [26] Jiaxin Chen, Jie Qin, Yuming Shen, Li Liu, Fan Zhu, and Ling Shao. Learning attentive and hierarchical representations for 3d shape recognition. In *Proc. Eur. Conf. Comput. Vis. (ECCV)*, pages 105–122. Springer, 2020.
- [27] Kai Sun, Jianshe Zhang, Junmin Liu, Ruixuan Yu, and Zengjie Song. Drcnn: Dynamic routing convolutional neural network for multi-view 3d object recognition. *IEEE Trans. Image Process. (TIP)*, 30:868–877, 2020.
- [28] Jingjia Huang, Wei Yan, Thomas H Li, Shan Liu, and Ge Li. Learning the global descriptor for 3d object recognition based on multiple views decomposition. *IEEE Trans. Multimedia (TMM)*, 2020.
- [29] Jinglin Xu, Xiangsen Zhang, Wenbin Li, Xinwang Liu, and Junwei Han. Joint multi-view 2d convolutional neural networks for 3d object classification. In *Proc. Int. Joint Conf. Artif. Intell. (IJCAI)*, pages 3202–3208, 2020.
- [30] Tan Yu, Jingjing Meng, Ming Yang, and Junsong Yuan. 3d object representation learning: A set-to-set matching perspective. *IEEE Trans. Image Process. (TIP)*, 30:2168–2179, 2021.
- [31] Jingjia Huang, Wei Yan, Ge Li, Thomas Li, and Shan Liu. Learning disentangled representation for multi-view 3d object recognition. *IEEE Trans. Circuits Syst. Video Technol. (TCSVT)*, 2021.
- [32] Weizhi Nie, Yue Zhao, Dan Song, and Yue Gao. Dan: Deep-attention network for 3d shape recognition. *IEEE Trans. Image Process. (TIP)*, 30:4371–4383, 2021.
- [33] Yong Xu, Chaoda Zheng, Ruotao Xua, Yuhui Quan, and Haibin Ling. Multi-view 3d shape recognition via correspondence-aware deep learning. *IEEE Trans. Image Process. (TIP)*, 2021.
- [34] Xin Wei, Yifei Gong, Fudong Wang, Xing Sun, and Jian Sun. Learning canonical view representation for 3d shape recognition with arbitrary views. In *Proc. IEEE Int. Conf. Comput. Vis. (ICCV)*, pages 407–416, 2021.
- [35] Yue Zhao, Weizhi Nie, An-An Liu, Zan Gao, and Yuting Su. Svhan: Sequential view based hierarchical attention network for 3d shape recognition. In *Proc. ACM Int. Conf. Multimedia (MM)*, pages 2130–2138, 2021.
- [36] Shuo Chen, Tan Yu, and Ping Li. Mvt: Multi-view vision transformer for 3d object recognition. In *Proc. Brit. Mach. Vis. Conf. (BMVC)*, 2021.
- [37] Zehua Liu, Yuhe Zhang, Jian Gao, and Shurui Wang. Vfmvac: View-filtering-based multi-view aggregating convolution for 3d shape recognition and retrieval. *Pattern Recognit. (PR)*, page 108774, 2022.
- [38] Zizhao Zhang, Haojie Lin, Xibin Zhao, Rongrong Ji, and Yue Gao. Inductive multi-hypergraph learning and its application on view-based 3d object classification. *IEEE Trans. Image Process. (TIP)*, 27(12):5957–5968, 2018.
- [39] Yifan Feng, Haoxuan You, Zizhao Zhang, Rongrong Ji, and Yue Gao. Hypergraph neural networks. In *Proc. AAAI Conf. Artif. Intell. (AAAI)*, volume 33, pages 3558–3565, 2019.
- [40] Junjie Bai, Biao Gong, Yining Zhao, Fuqiang Lei, Chenggang Yan, and Yue Gao. Multi-scale representation learning on hypergraph for 3d shape retrieval and recognition. *IEEE Trans. Image Process. (TIP)*, 2021.

- [41] Yue Gao, Yifan Feng, Shuyi Ji, and Rongrong Ji. Hgnn+: General hypergraph neural networks. *IEEE Trans. Pattern Anal. Mach. Intell. (TPAMI)*, 2022.
- [42] Liping Nong, Jie Peng, Wenhui Zhang, Jiming Lin, Hongbing Qiu, and Junyi Wang. Adaptive multi-hypergraph convolutional networks for 3d object classification. *IEEE Trans. Multimedia (TMM)*, 2022.
- [43] Jiyang Zhang, Fuyang Li, Xi Xiao, Tingyang Xu, Yu Rong, Junzhou Huang, and Yatao Bian. Hypergraph convolutional networks via equivalency between hypergraphs and undirected graphs. In *Int. Conf. Mach. Learn. Workshops (ICMLW)*, 2022.
- [44] Zhizhong Han, Xinhai Liu, Yu-Shen Liu, and Matthias Zwicker. Parts4feature: Learning 3d global features from generally semantic parts in multiple views. In *Proc. Int. Joint Conf. Artif. Intell. (IJCAI)*, 2019.
- [45] Geoffrey Hinton, Oriol Vinyals, and Jeff Dean. Distilling the knowledge in a neural network. In *Adv. Neural Inf. Process. Syst. Workshops (NeurIPS W)*, 2014.
- [46] Scott Reed, Honglak Lee, Dragomir Anguelov, Christian Szegedy, Dumitru Erhan, and Andrew Rabinovich. Training deep neural networks on noisy labels with bootstrapping. In *Proc. Int. Conf. Learn. Represent. Workshops (ICLRW)*, 2015.
- [47] Pengfei Chen, Junjie Ye, Guangyong Chen, Jingwei Zhao, and Pheng-Ann Heng. Beyond class-conditional assumption: A primary attempt to combat instance-dependent label noise. In *Proc. AAAI Conf. Artif. Intell. (AAAI)*, volume 35, pages 11442–11450, 2021.
- [48] Yikai Zhang, Songzhu Zheng, Pengxiang Wu, Mayank Goswami, and Chao Chen. Learning with feature-dependent label noise: A progressive approach. In *Proc. Int. Conf. Learn. Represent. (ICLR)*, 2021.
- [49] Chang-Bin Zhang, Peng-Tao Jiang, Qibin Hou, Yunchao Wei, Qi Han, Zhen Li, and Ming-Ming Cheng. Delving deep into label smoothing. *IEEE Trans. Image Process. (TIP)*, 30:5984–5996, 2021.
